# Supplementary material for: Gs-coupled GPCR signalling in AgRP neurons triggers sustained increase in food intake
Source: PubMed Central journal article supplement (PMC4729878; doi:10.1038/ncomms10268), 2016-01-08
Supplement: ncomms10268-s1.pdf [file ncomms10268-s1.pdf]

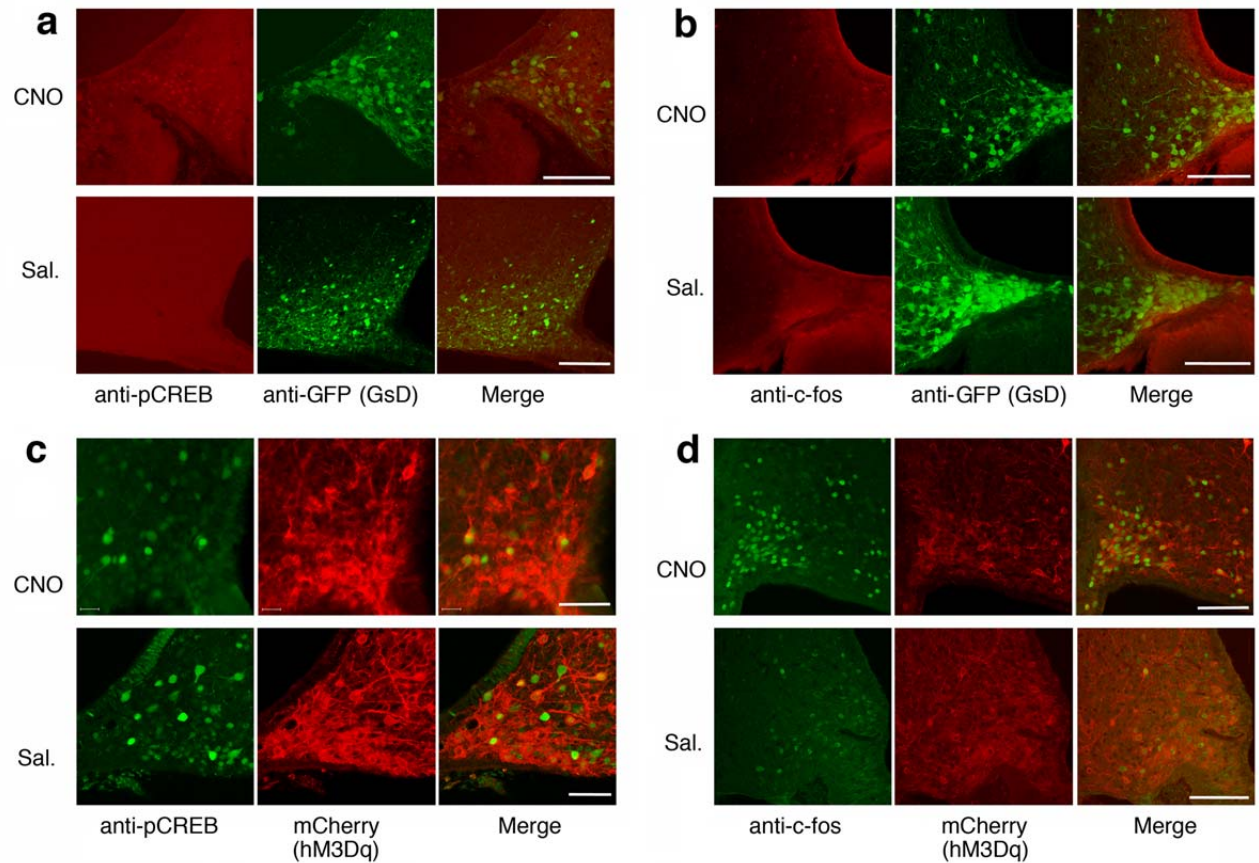

**Supplementary Figure 1.** CNO activation of the GsD designer receptor selectively promotes pCREB expression in AgRP neurons of the ARC. This figure shows representative low-magnification confocal images. **(a, b)** AAV-mediated functional expression of GsD (GsD-eGFP) in AgRP neurons. pCREB (a) or c-fos (b) expression in AgRP neurons of GsD-AgRP mice was studied after CNO ( $1 \text{ mg kg}^{-1}$ ) or saline (control) treatment. pCREB and c-fos expression were revealed by anti-pCREB- and anti-c-fos antibodies, respectively. The GsD DREADD was visualized by an anti-GFP antibody targeted at the eGFP tag fused to the C-terminus of GsD. The images show selective, CNO-mediated induction of pCREB expression in GsD-expressing AgRP neurons. **(c, d)** AAV-mediated functional expression of hM3Dq (hM3Dq-mCherry) in AgRP neurons. pCREB (c) or c-fos (d) expression in AgRP neurons of hM3Dq-AgRP mice was studied after CNO ( $1 \text{ mg kg}^{-1}$ ) or saline (control) treatment. pCREB and c-fos expression were revealed by anti-pCREB- and anti-c-fos antibodies, respectively. The hM3Dq DREADD was visualized by mCherry fluorescence (note that this DREADD contained a C-terminal mCherry tag). The images show selective, CNO-mediated induction of c-fos expression in hM3Dq-expressing AgRP neurons. Scale bars: (a, b, d),  $100 \mu\text{m}$ ; (c),  $50 \mu\text{m}$ .

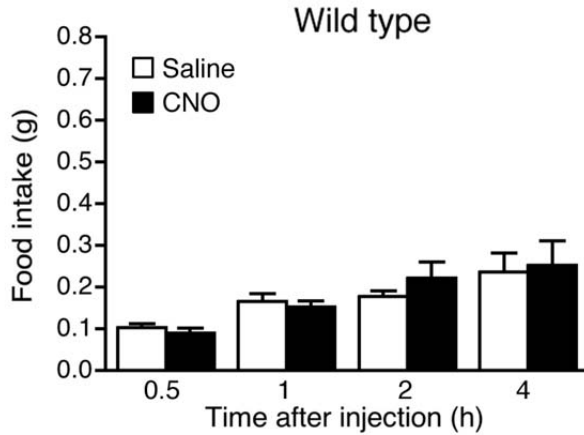

**Supplementary Figure 2.** CNO has no significant effect on food intake in WT mice. Food intake was measured after a single i.c.v. injection of either saline or CNO (1  $\mu$ g) for the indicated period of time. Injections were performed between 9 to 10 a.m. Experiments were carried out with WT mice (17-week old males). Data are given as means  $\pm$  s.e.m. (n=4 or 5 mice per group).

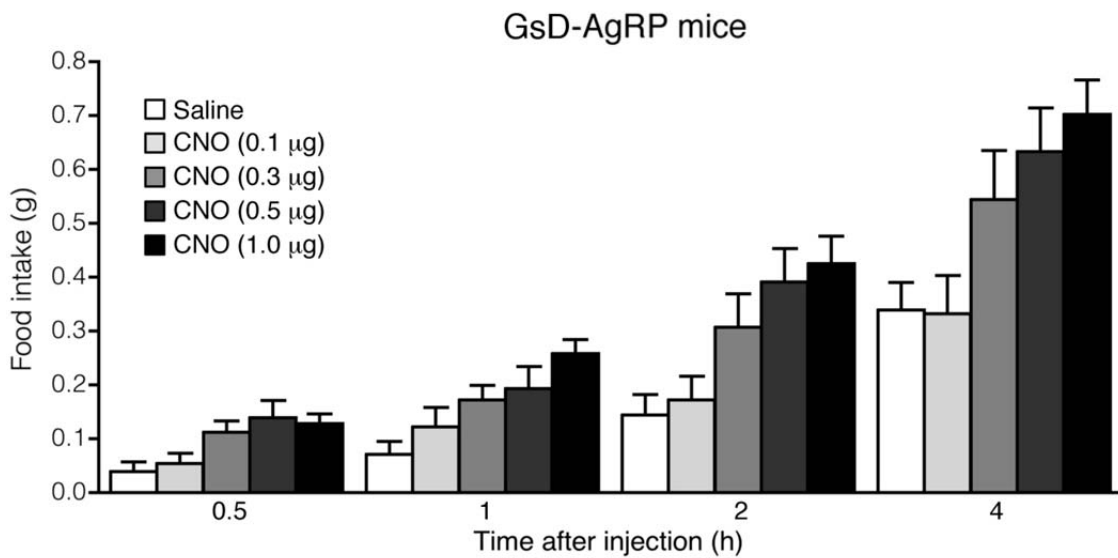

**Supplementary Figure 3.** CNO promotes food intake in GsD-AgRP mice in a dose-dependent manner. Food intake was measured after a single i.c.v. injection of either saline or CNO (0.1, 0.3, 0.5, or 1  $\mu$ g) for the indicated time period. Injections were performed between 9 to 10 a.m. Experiments were carried out with male GsD-AgRP mice (10-16 weeks old). Data are given as means  $\pm$  s.e.m. (n=4-7 mice per group).

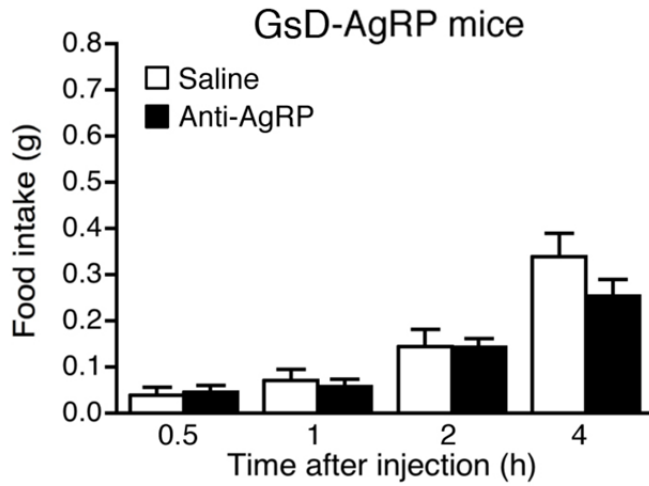

**Supplementary Figure 4.** In the absence of CNO, an anti-AgRP antibody has no significant effect on food intake in GsD-AgRP mice. Food intake was monitored after a single i.c.v. injection of either saline or an anti-AgRP antibody (1  $\mu$ g) for the indicated period of time (injection time: 9 to 10 a.m.). Experiments were carried out with male GsD-AgRP mice (24 weeks old) in the absence of CNO. Data are given as means  $\pm$  s.e.m. (n=6 or 7 mice per group).

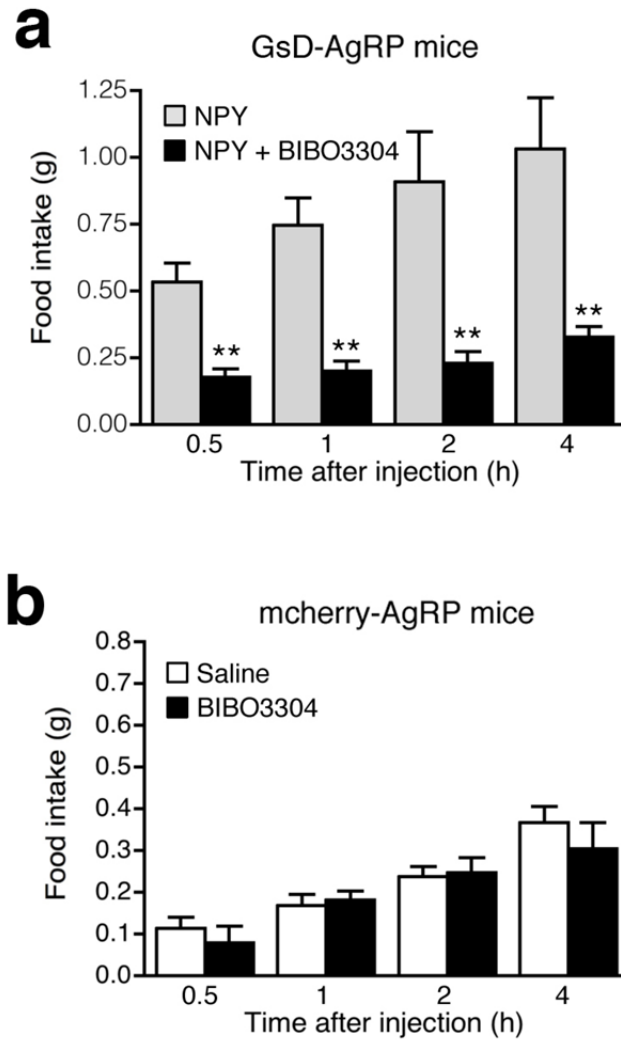

**Supplementary Figure 5.** An NPY Y<sub>1</sub> receptor blocker prevents NPY-induced increases in food intake. **(a)** GsD-AgRP mice were injected i.c.v. with NPY (0.85 μg) or NPY (0.85 μg) plus BIBO3304 (3.3 μg), a selective NPY Y<sub>1</sub> receptor antagonist (injection time: 9 to 10 a.m.). Food intake was monitored over the indicated period of time (15-week-old males; n=3 or 4 per group). **(b)** Using the same experimental protocol, control mice (mcherry-AgRP mice) were injected i.c.v. with either saline or BIBO3304 (3.3 μg) alone (13-15-week-old males; n=4 or 5 per group). Data are given as means ± s.e.m. \*\*p<0.01 as compared to the group injected with NPY alone (Student's *t*-test).

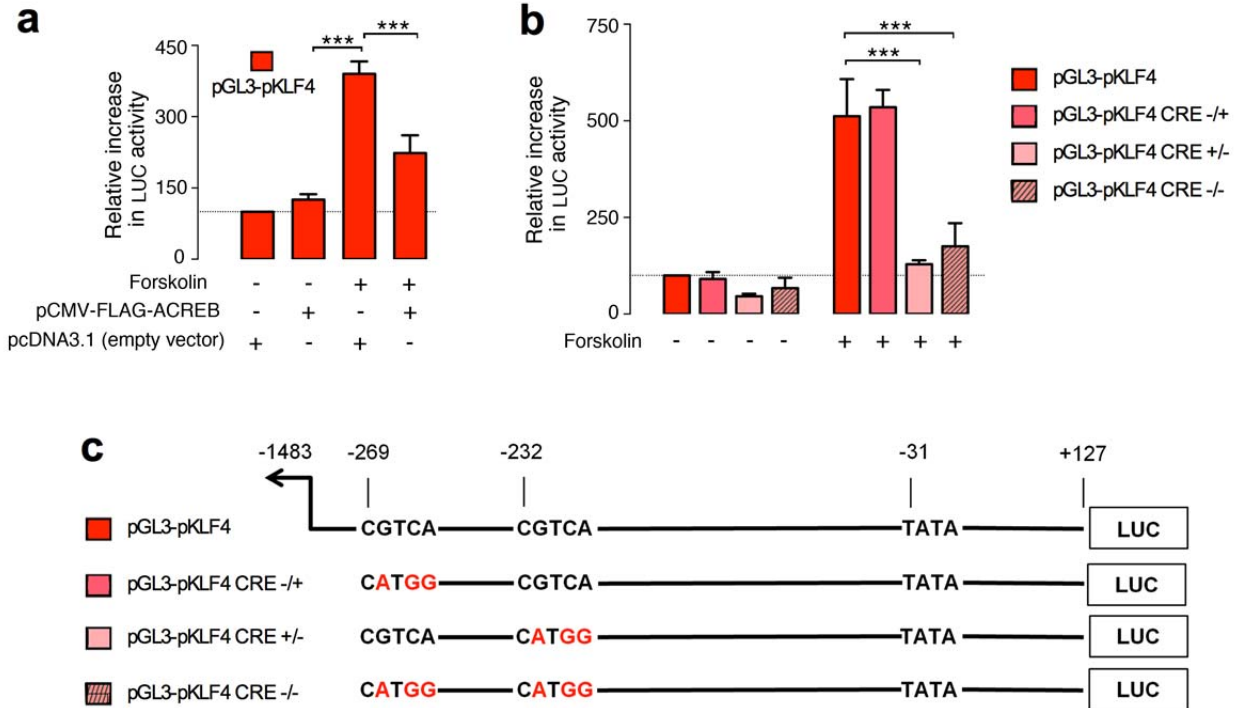

**Supplementary Figure 6.** The *KLF4* promoter is a direct target of activated CREB. (a, c) For *KLF4* promoter-luciferase reporter assays, the pGL3-pKLF4 luciferase reporter construct was expressed in HEK293T cells. Following incubation of transfected cells with forskolin (10  $\mu$ M) or vehicle (DMSO), luciferase (LUC) activity was determined. Forskolin stimulation resulted in a robust increase of LUC activity in the pGL3-pKLF4-transfected cells. This response was greatly reduced after co-transfection of pGL3-pKLF4 with pCMV-FLAG-ACREB which codes for a dominant negative version of CREB. (b, c) The two half CRE sites contained within the *KLF4* promoter were mutated by site-directed mutagenesis. Mutation of the second half CRE site (at -232), but not of the first half CRE site (at -269), almost completely abolished forskolin-mediated stimulation of *KLF4* promoter activity. Data are presented as means  $\pm$  s.e.m. of three independent experiments each performed in duplicate (\*\*\*)  $p < 0.001$ ; two-way ANOVA, Tukey's multiple comparisons test).

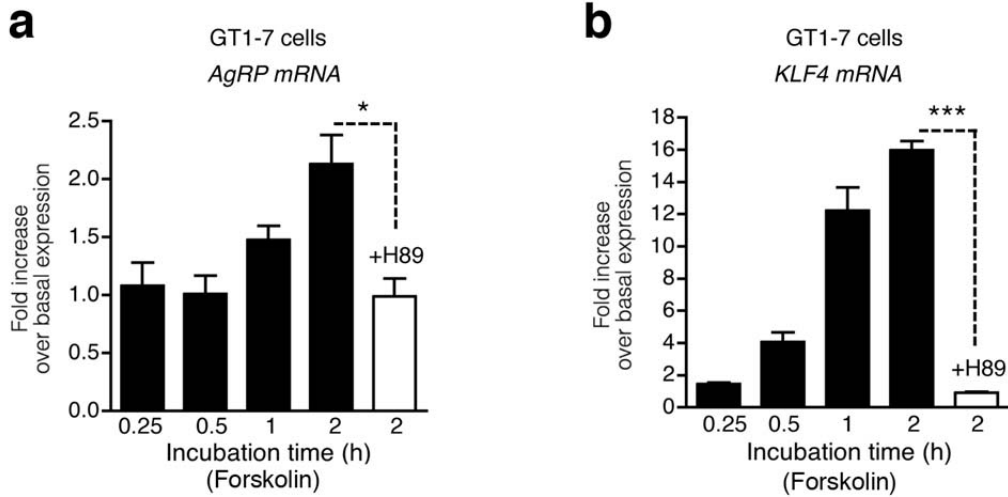

**Supplementary Figure 7.** Effect of forskolin on *AgRP* and *KLF4* mRNA expression in GT1-7 cells. **(a, b)** GT1-7 cells were incubated with forskolin (10  $\mu$ M) for the indicated periods of time, followed by measurement of *AgRP* (a) and *KLF4* (b) transcript levels. Please note that addition of the PKA inhibitor, H89 (75  $\mu$ M), completely suppressed the forskolin-induced increases in *AgRP* and *KLF4* expression. Data are given as means  $\pm$  s.e.m. (n=4).  $p < 0.05^*$ ,  $p < 0.001^{***}$ , as compared to the corresponding H89-treated group (Student's *t*-test).

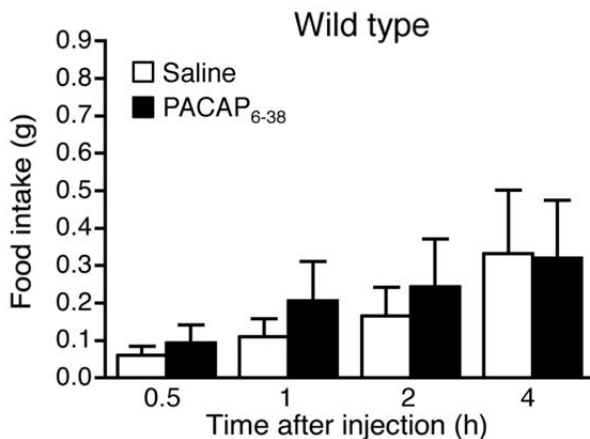

**Supplementary Figure 8.** PACAP<sub>6-38</sub> has no significant effect on food intake in WT mice. WT mice (28-week-old males) received a single i.c.v. injection of either saline or PACAP<sub>6-38</sub> (1.2  $\mu$ g), a potent PAC<sub>1</sub> receptor antagonist. Food intake was measured after the indicated periods of time. Data are given as means  $\pm$  s.e.m. (n=4 per group).

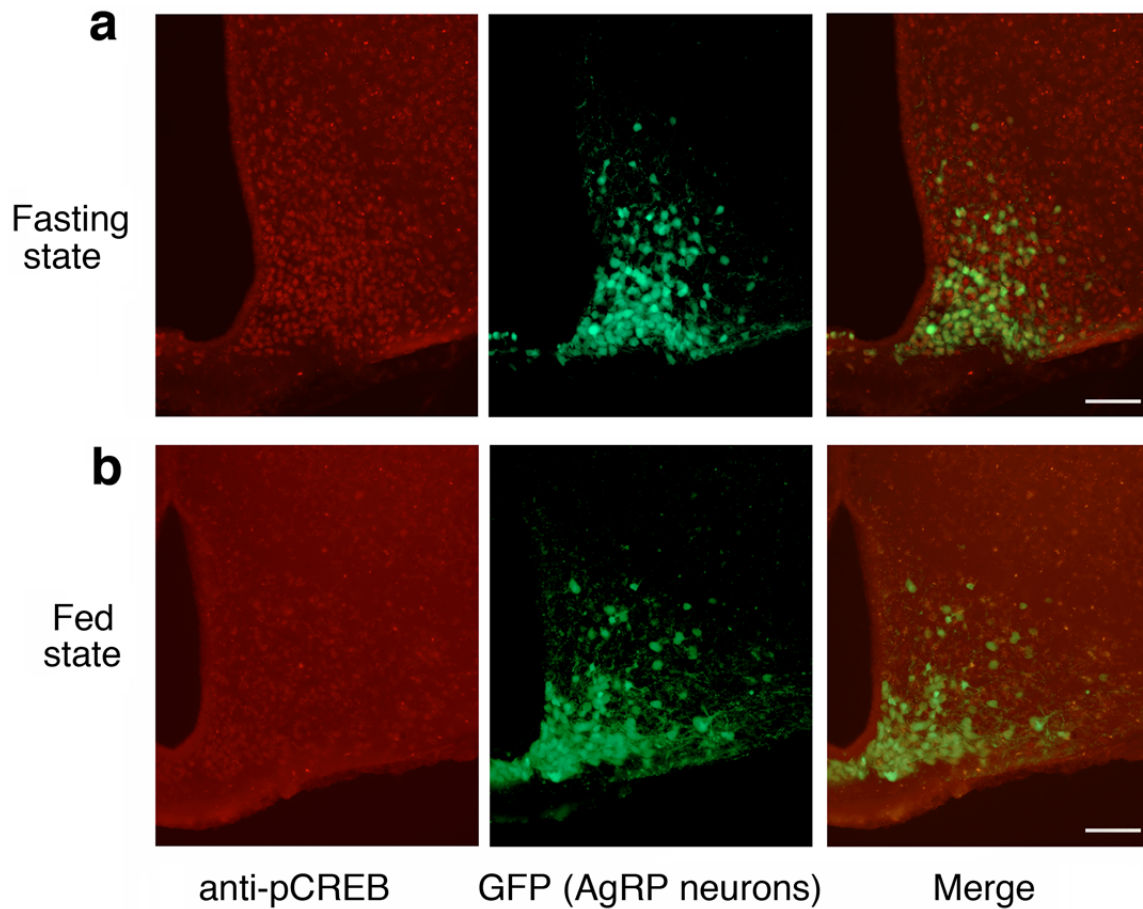

**Supplementary Figure 9.** Fasting-induced increases in pCREB expression in AgRP neurons. This figure shows representative low-magnification confocal images. **(a)** Representative images of hypothalamic sections obtained from *Npy-GFP* mice after a 20 hr fast. pCREB-expressing cells are visualized by an anti-pCREB antibody (red stain, left panel). AgRP (NPY)-positive neurons are visualized by green GFP fluorescence (center panel). The right panel represents a merged image indicating that most AgRP neurons are pCREB-positive. **(b)** Images corresponding to the ones shows in (a) were obtained with freely fed *Npy-GFP* mice, indicating a striking reduction in pCREB-positive AgRP neurons. Scale bars, 100  $\mu$ m.

### Supplementary Table 1

Functional expression of the GsD designer receptor containing a C-terminal eGFP tag in COS-7 cells

| DREADD   | $[^3\text{H}]\text{NMS}$ binding |                           | CNO-induced cAMP accumulation |                  |                       |
|----------|----------------------------------|---------------------------|-------------------------------|------------------|-----------------------|
|          | $K_D$                            | $B_{\text{max}}$          | $EC_{50}$                     | Basal cAMP       | $E_{\text{max}}$ cAMP |
|          | <i>nM</i>                        | <i>nmol/mg of protein</i> | <i>nM</i>                     | <i>pmol/well</i> | <i>pmol/well</i>      |
| GsD      | $1.5 \pm 0.1$                    | $11.7 \pm 1.7$            | $4.2 \pm 1.4$                 | $2.2 \pm 0.5$    | $17.1 \pm 2.4$        |
| GsD-eGFP | $2.1 \pm 0.2$                    | $16.2 \pm 2.6$            | $4.9 \pm 1.6$                 | $1.1 \pm 0.1$    | $8.6 \pm 1.3$         |

$[^3\text{H}]\text{NMS}$  saturation binding studies and cAMP assays were carried out with transiently transfected COS-7 cells, as described by Guettier et al.<sup>16</sup>. Data are given as means  $\pm$  s.e.m. of three independent experiments carried out in duplicate. No significant  $[^3\text{H}]\text{NMS}$  binding or CNO-induced cAMP accumulation was observed with control cells transfected with empty vector DNA.



## Supplementary Table 2

Summary of antibodies used for immunohistochemical studies

| <b>Antibody target</b>                                                | <b>Source of antibody</b>                  | <b>Catalog #</b> | <b>Dilution</b> |
|-----------------------------------------------------------------------|--------------------------------------------|------------------|-----------------|
| GFP                                                                   | Abcam, Cambridge, MA                       | ab6662           | 1:400           |
| AgRP                                                                  | Phoenix Pharmaceuticals,<br>Burlingame, CA | H-003-57         | 1:1,000         |
| c-fos                                                                 | Abcam, Cambridge, MA                       | ab99515          | 1:500           |
| RFP (mcherry)                                                         | Abcam, Cambridge, MA                       | ab34764          | 1:400           |
| pCREB                                                                 | Cell Signaling Technology, Danvers,<br>MA  | 9198             | 1:500           |
| KLF4                                                                  | R&D Systems, Minneapolis, MN               | AF3640           | 1:200           |
| HA                                                                    | Cell Signaling Technology, Danvers,<br>MA  | 3724             | 1:500           |
| Anti-rabbit IgG, Alexa<br>Fluor® 594-conjugated<br>secondary antibody | Abcam, Cambridge, MA                       | ab150064         | 1:1,000         |
| Anti-rabbit IgG, FITC<br>conjugated secondary<br>antibody             | Life Technologies, Frederick, MD           | A11008           | 1:1,000         |
| Anti-goat IgG, Alexa<br>Fluor® 488-conjugated<br>secondary antibody   | Abcam, Cambridge, MA                       | ab150137         | 1:1,000         |
| Anti-goat IgG, Alexa<br>Fluor® 594-conjugated<br>secondary antibody   | Life Technologies, Frederick, MD           | A11058           | 1:1000          |

### Supplementary Table 3

Summary of PCR primers used for qRT-PCR experiments

| <b>Mouse gene</b>               | <b>Primer sequence</b>                                                | <b>Amplicon (bp)</b> |
|---------------------------------|-----------------------------------------------------------------------|----------------------|
| <i><math>\beta</math>-actin</i> | Forward: 5' CTAAGGCCAACCGTGAAAAG<br>Reverse: 5' ACCAGAGGCATACAGGGACA  | 104                  |
| <i>AgRP</i>                     | Forward: 5' TTTGTCCTCTGAAGCTGTATGC<br>Reverse: 5' GCATGAGGTGCCTCCCTA  | 86                   |
| <i>KLF4</i>                     | Forward: 5'<br>CACACAGGCGAGAAACCTTACC<br>Reverse: 5' CGGAGCGGGCGAATTT | 64                   |
| <i>NPY</i>                      | Forward: 5' CCGCTCTGCGACACTACAT<br>Reverse: 5' TGTCTCAGGGCTGGATCTCT   | 68                   |
